# Supplementary material for: A multifunctional polymeric coating with self-adsorbed, antifouling and in situ remineralization properties for caries management
Source: Royal Society of Chemistry journal article supplement (doi:10.1039/d3tb00377a), 2023-01-01
Supplement: d3tb00377a1.pdf [file d3tb00377a1.pdf]

## A Multifunctional Polymeric Coating with Self-adsorbed, Antifouling and in Situ Remineralization Properties for Caries Management

Wenlin Chu,<sup>a</sup> Haiqin Tang,<sup>b</sup> Zhiyun Dong,<sup>b</sup> Ailin Hou,<sup>a</sup> Rongmin Qiu,<sup>c</sup> Xinyuan Xu,<sup>b</sup> Jiaojiao Yang,<sup>a</sup> Libang He,<sup>\*a</sup> Jun Luo<sup>b</sup> and Jianshu Li<sup>\*a, b, d</sup>

- State Key Laboratory of Oral Diseases, West China Hospital of Stomatology, Sichuan University, Chengdu 610065, China.
- College of Polymer Science and Engineering, State Key Laboratory of Polymer Materials Engineering, Sichuan University, Chengdu 610065, China.
- College & Hospital of Stomatology, Guangxi Medical University, Guangxi Key Laboratory of Oral and Maxillofacial Rehabilitation and Reconstruction, Guangxi Clinical Research Center for Craniofacial Deformity, Guangxi Key Laboratory of Oral and Maxillofacial Surgery Disease Treatment, Guangxi Health Commission Key Laboratory of Prevention and Treatment for Oral Infectious Diseases, Nanning 530021, China.
- Med-X Center for Materials, Sichuan University, Chengdu, 610041, China.

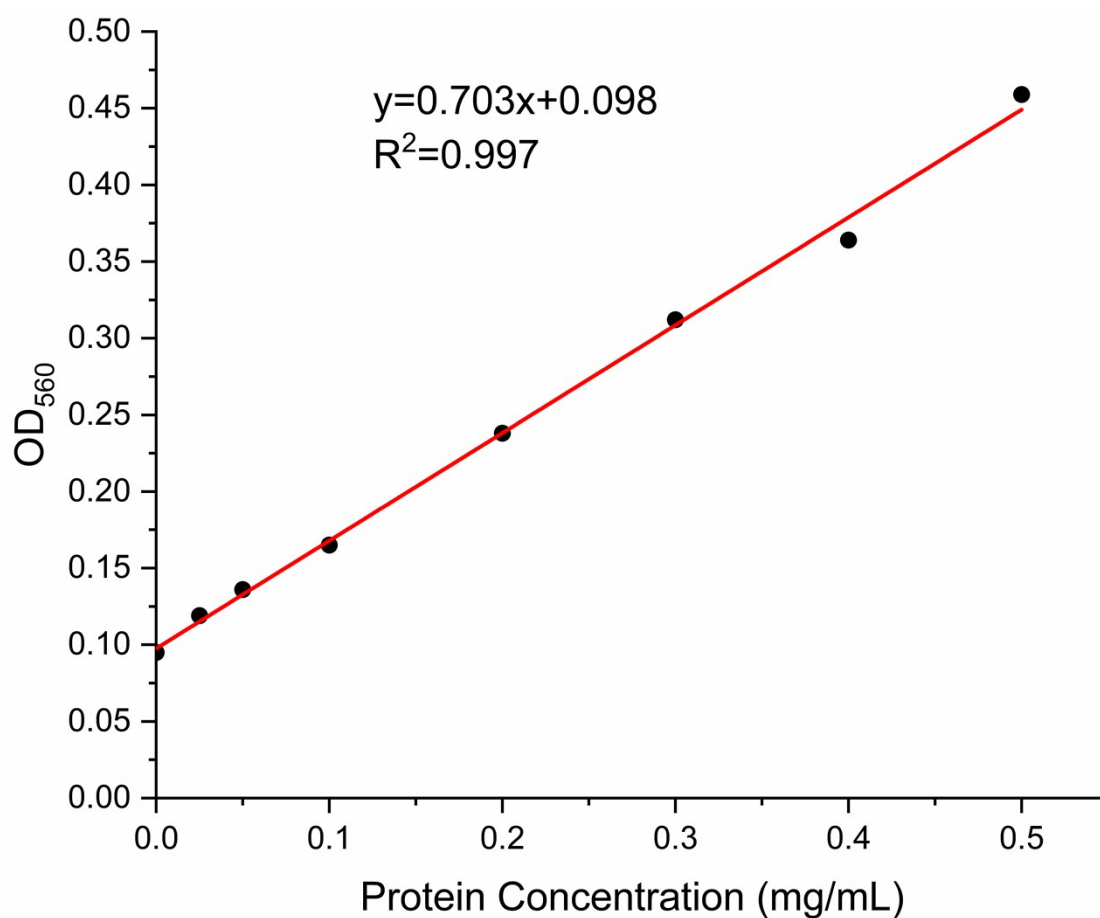

Fig. S1 The BCA protein assay standard curve.

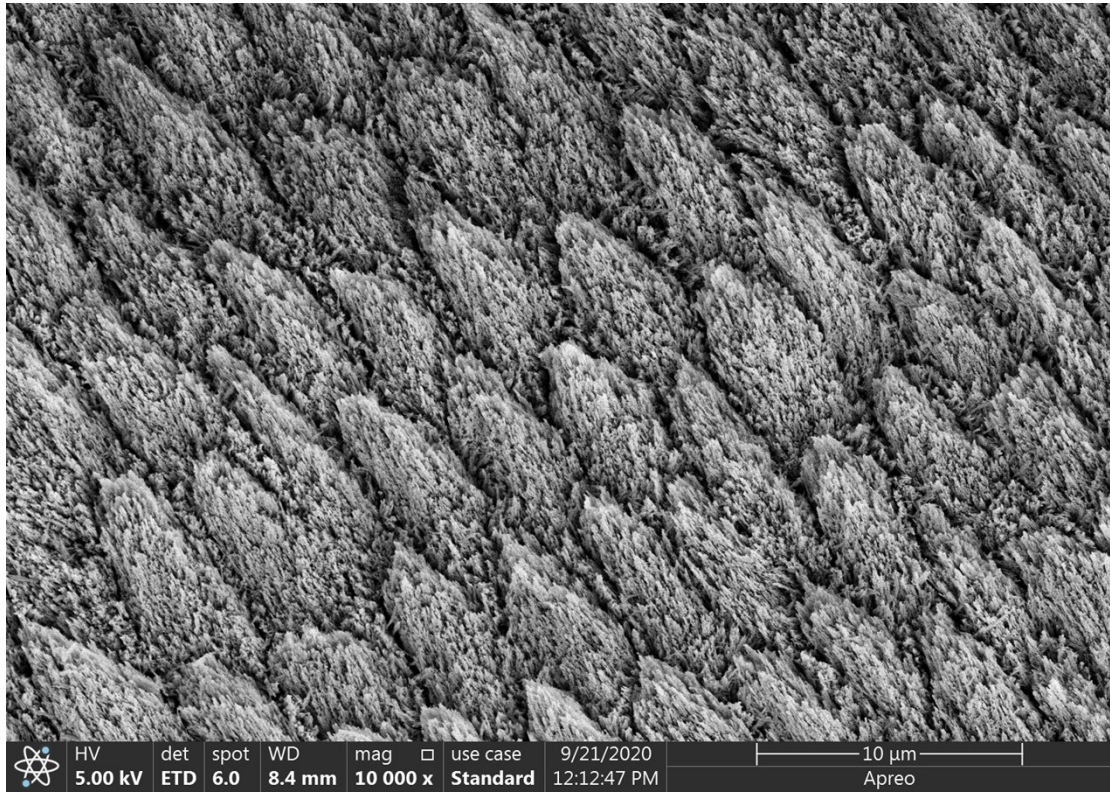

Fig. S2 The morphology image of the acid-etched enamel observed by SEM.
